# Supplementary material for: Computational Study of Hippocampal-Septal Theta Rhythm Changes Due to Beta-Amyloid-Altered Ionic Channels
Source: PLoS One. 2011 Jun 24;6(6):e21579. doi: 10.1371/journal.pone.0021579 (PMC3123375; doi:10.1371/journal.pone.0021579)
Supplement: Appendix S1 — Definition of the model parameters. (DOC) [file pone.0021579.s001.doc]

Appendix S1

The membrane capacitance for all of the follow equations, therefore it will be ignored. The τ in (*ms*); *E* and *V* in (*mV*); *I* in (); g in (); and in (*ms-1*); *K* in (); B in () and the rest are dimensionless constant. We used an Euler method for numerically integrating the stochastic differential equations, using a time step of 0.01ms. Smaller time steps do not change our results.

A.1 Neuronal dynamics

The pyramidal somatic and dendritic membrane potentials, denoted by Vs and Vd, obtains the following equations:

(A1)

(A2)

Where is the coupling conductance between soma and dendrite, *p=somatic area/total area=0.5*. *I* is the injected DC current and *Isyn* is the synaptic currents. *IL=gL(V-EL)*. In our work, all of the ionic currents are modelled by the Hodgkin-Huxley type formalism, thus the dynamic of a gating variable *x* satisfies first-order kinetics,

(A3)

This equation will be used to calculate all of the gating variables.

| Channel | Definition | Parameters |
| --- | --- | --- |
| *INa* |  |  |
| *IK* |  |  |
| *ICa* |  |  |
| *IAHP* |  |  |
| *IA* |  |  |
| *ICT* |  |  |
|  |  | Values of and corresponding to different *V* can be found in (supplementary) |

The values of the other parameters are , *gL=0.1* and *gCa=0.5* for soma and dendrite, *gNa=45, gK=18, gA=30* *gCT=140* and *gh=0.01* for soma and *gAHP=5, gA=60* *gCT=70* and *gh=0.02* for dendrite; *EL=-65, ENa=55, EK=-80, ECa=120,* and .

The OLM neuron is described as a single compartment model,

(A4)

| Channel | Definition | Parameters |
| --- | --- | --- |
| *INa* |  |  |
| *IK* |  |  |
| *ICa* |  |  |
| *IAHP* |  |  |
| *Ih* |  |  |

The other parameters are , , , , , , ; , , , , ,.

The basket neuron is described as a single compartment model,

(A6)

The parameters for calculation of the ionic currents are the same as that of OLM and .

The MSGABA neuron is described as a single compartment model,

(A7)

| Channel | Definition | Parameters |
| --- | --- | --- |
| INa |  |  |
| IK |  |  |
| 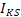 |  |  |

The other parameters are , , , , ; , , , .

A.2 Synaptic connection definition

There are three types of synaptic neurotransmitters, the inhibitory GABAA, the excitatory NMDA and AMPA. The GABAA inhibitory post synaptic current (IPSC) is described as , where the activation variable *s* is calculated by . The is the presynaptic neuron membrane potential, . Parameters for different neurons couples are:

| basket-pyramidal (b-p) | , , , , |
| --- | --- |
| OLM-basket (o-b) | , , , , |
| OLM-pyramidal (o-p) | , , , , |
| OLM-MSGABA (o-m) | , , , , |
| basket-basket (b-b) | , , , , |
| MSGABA-OLM (m-o) | , , , , |
| MSGABA-MSGABA (m-m) | , , , , |
| MSGABA-basket (m-b) | , , , , |

The AMPA and NMDA excitatory post synaptic current (EPSP) are described as and , respectively. *s* is updated as , , *Vp=2*, *VK=5*, *B(V)* is calculated by , where *[Mg2+]=1mM* by default. The and for AMPA and NMDA are and, respectively. , and. The summated synaptic current is normalized by the number of presynaptic neurons.
